# Supplementary material for: Unleashing the photocatalytic potential of a noble-metal-free heteroleptic copper complex-based nanomaterial for an enhanced aza-Henry reaction
Source: Royal Society of Chemistry journal article supplement (doi:10.1039/d3nr01915b), 2023-01-01
Supplement: d3nr01915b1.pdf [file d3nr01915b1.pdf]

## Unleashing the photo catalytic potential of noble-metal-free heteroleptic copper complex-based nanomaterial for enhanced aza-Henry reaction

Pooja Rana,<sup>a#</sup> Kapil Mohan Saini,<sup>b#</sup> Bhawna Kaushik,<sup>ac</sup> Kanika Solanki,<sup>ad</sup> Ranjana Dixit<sup>ae</sup> and Rakesh K. Sharma<sup>\*a</sup>

### Abstract

In this work, we have fabricated a versatile and noble metal free copper based heterogeneous photocatalyst to represent a green shift from precious group metals such as Ir, Ru, Pt which have been widely utilized as photocatalysts. The successfully synthesized and characterized copper photocatalyst was employed to establish a Cross dehydrogenative coupling via C–H activation between tertiary amines and carbon nucleophiles. The highly efficient copper based photocatalyst has been characterized by numerous physico-chemical techniques, which advocate the successful formation as well as its high activity. Inductively coupled plasma (ICP-OES) analysis revealed that the composite Cu@Xantphos@ASMNPs has very high loading of 0.423 mmol/g of copper. The magnetic Cu@Xantphos@ASMNPs have been utilized as potential heterogeneous photocatalyst for very facile and regioselective conversion of aryl tetrahydroquinoline to respective nitroalkyl aryl tetrahydroisoquinoline in high yield using air as an oxidant and methanol as green solvent over irradiation with visible light under mild reaction conditions. Additionally, the catalyst shows exceptional chemical stability and reusability without any agglomeration even after several cycles of use are one of the key features of this material and strive as a potential candidate from economic and environmental perspectives.

## Table of Content

|          |                       |  |
|----------|-----------------------|--|
| <b>1</b> | General Information   |  |
| <b>2</b> | Result and Discussion |  |
| <b>3</b> | NMR Data              |  |
| <b>4</b> | NMR Spectra           |  |
| <b>5</b> | References            |  |

## General Information

**Material Synthesis.** Unless otherwise indicated, all the chemicals were purchased from commercial source and were utilized without further purifications. Ferric sulphate hydrate and ferrous sulphate heptahydrate were obtained from Central Drug house and Thomas Bakers, respectively. The commercially unavailable tetrahydroisoquinoline derivatives were prepared in the lab by utilizing the previously reported procedure.<sup>1</sup> All the photochemical reactions were carried out in inert atmosphere, unless otherwise indicated. Double distilled water was used throughout for the synthetic procedures of materials.

**Material Characterization.** The various physiochemical techniques such as Fourier transform-infrared spectroscopy (FT-IR), powder X-ray diffraction (PXRD), UV-Vis spectroscopy, high resolution-transmission electron microscopy (HR-TEM), vibrating sample magnetometry (VSM), inductively coupled-plasma optical emission spectrometry (ICP-OES), X-ray photoelectron spectroscopy (XPS), energy-dispersive X-ray spectroscopy (EDS), energy-dispersive X-ray fluorescence (ED-XRF), and nuclear magnetic resonance spectroscopy (NMR) were utilized to characterise the fabricated Cu@Xantphos@ASMNPs catalyst. The Fourier transform-infrared spectra were investigated in the range of 4000 to 400  $\text{cm}^{-1}$  by employing PerkinElmer Spectrum 2000 using KBr pellet method. PXRD patterns were recorded to determine the phase, purity and crystalline nature on a Rigaku Cu ( $K_{\alpha}$ ) diffractogram at a scan rate of 4 degree per min and  $2\theta$  range of 4-80 degree. UV-Vis spectrum of Cu@Xantphos@ASMNPs has been investigated on a Thermo Scientific absorption spectrophotometer within the wavelength range of 250-800 nm. FEI TECHNAI G2 T20 transmission electron microscope was utilized to capture the TEM images of the nanoparticles at 200 KV. The TEM samples of MNPs, SMNPs, Cu@Xantphos@ASMNPs were prepared by drop casting method where the desired nanoparticles were drop cast over a carbon coated copper grid. Elemental analysis of the catalyst was acquired using an Ametek EDAX system. Copper loading/content of the Cu@Xantphos@ASMNPs catalyst was quantitatively analysed by Perkin Elmer Avio 200 ICP-OES System. Magnetization of the nanoparticles were recorded using a vibrating sample magnetometer (EV-9, Microsense, ADE) in the range of -10000 Oe to 10000 Oe.  $^1\text{H}$  NMR (400 MHz) and  $^{13}\text{C}$  NMR (100 MHz) spectra were recorded on a JEOL JNM-EXCP 400 and data are reported in terms of chemical shift related to  $\text{CDCl}_3$  (7.26 ppm) or with tetramethylsilane (TMS,  $\delta$  0.00 ppm) as the internal standard, abbreviation used to indicate the multiplicity (s = singlet, d = doublet, t = triplet, q = quartet, m = multiplet, dd = doublet of

doublet, dt = doublet of triplet, ddd = doublet of doublet of doublet), coupling constant (Hz), integration. Thin-layer chromatography (TLC) was performed by utilizing Merck silica gel plates 60 F<sub>254</sub> to check the course of reactions and visualised under UV light.

Light Source: 20 W Philips white LED bulbs, Quantity of light source: Two

**Figure S1.** Photocatalytic reaction setup.

## RESULT AND DISCUSSION

### XRD

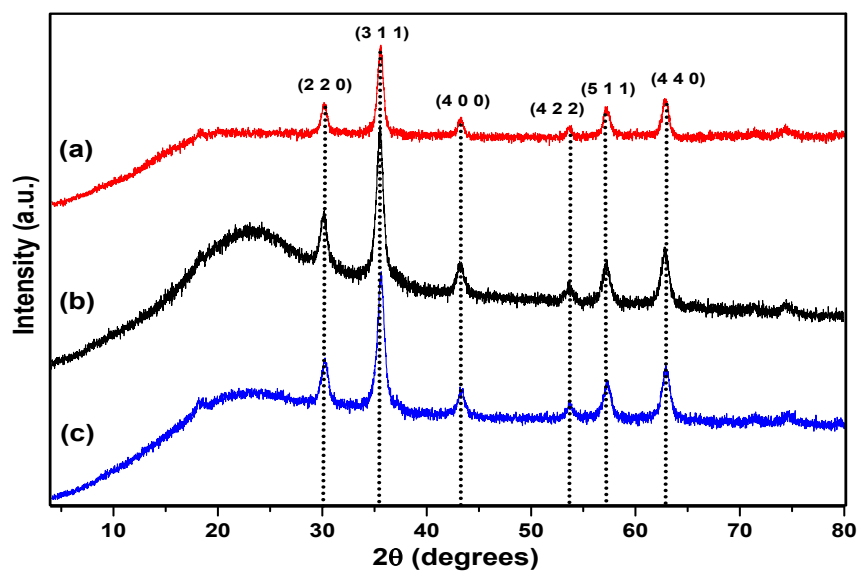

**Figure S2.** PXRD pattern of a) MNPs, b) SMNPs and c) Cu@Xantphos@SMNPs.

## XPS

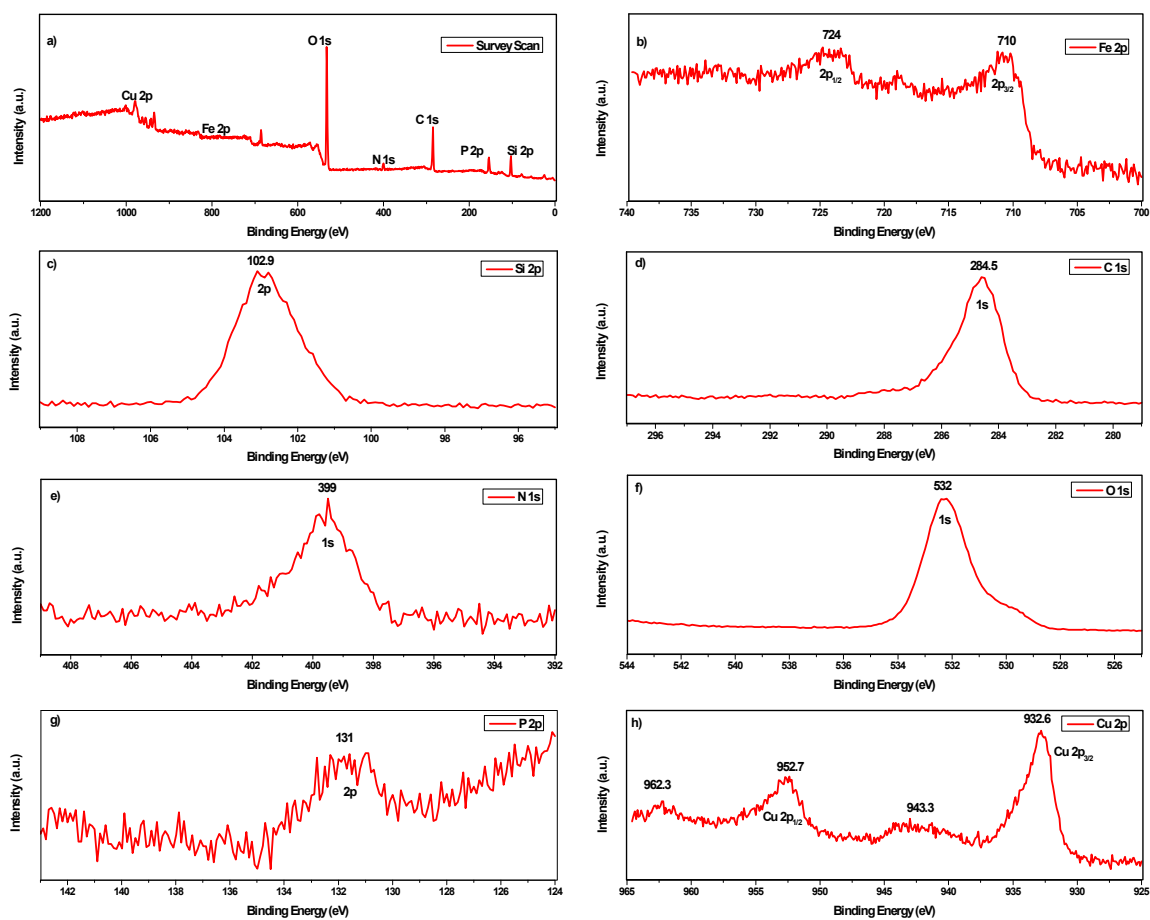

**Figure S3.** a) XPS survey spectra of Cu@Xantphos@ASMNPs catalyst and detailed XPS spectra of b) Fe 2p, c) Si 2p, d) C 1s, e) N 1s, (f) O 1s, (g) P 2p and (h) Cu 2p.

## TGA

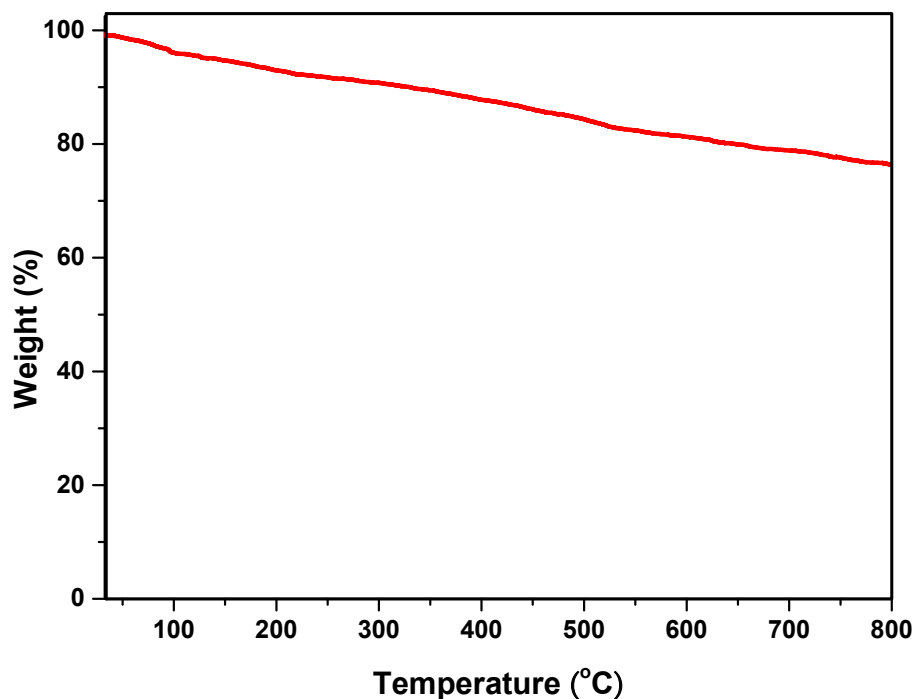

**Figure S4.** TGA analysis of Cu@Xantphos@ASMNPs photocatalyst.

## COMPARISON WITH LITERATURE PRECEDENTS

Comprehensive literature survey suggests the predominance of earth abundant, cheap and non-toxic Cu@Xantphos@ASMNPs over the previously reported catalysts in terms of mild reaction conditions, lower reaction time, high yield, facile magnetic recoverability and recyclability (Table S1). Moreover, the catalytic reaction showed high selectivity, with no over oxidised product formation. The Cu@Xantphos@ASMNPs photoredox nanocatalyst also showed promising results in terms of mild reaction condition in comparison with the literature precedents (Table S1).

**Table S1.** Comparison of the catalytic activity of the fabricated photocatalyst with the earlier reported heterogeneous photocatalysts for cross-dehydrogenative coupling.

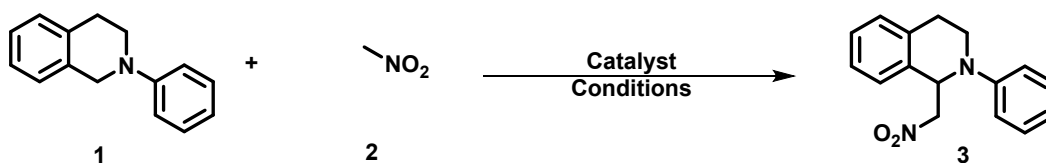

| S. No. | Catalyst                                                                                                  | Conditions                                 | Light source                                  | Recyclability | Yield (%) | Ref. |
|--------|-----------------------------------------------------------------------------------------------------------|--------------------------------------------|-----------------------------------------------|---------------|-----------|------|
| i      | 2 mol % Cot-RB Catalyst                                                                                   | 20 mol% pyrrolidine/TFA, acetone, RT, 24 h | 12 W green LEDs                               | 6             | 93        | 2    |
| ii     | 10 mg EY-POP-1                                                                                            | RT, air, 24 h                              | 14 W household bulb                           | 12            | 98        | 3    |
| iii    | 1 equiv of TiO <sub>2</sub> (P25)                                                                         | EtOH                                       | 11 W fluorescent lamp                         | 5             | 75        | 4    |
| iv     | MNPs-eosin Y (0.25 mmol)                                                                                  | DMSO, RT, air, 12 h                        | 3 W green LEDs                                | 8             | 92        | 5    |
| v      | Cu <sub>2</sub> O–MoS <sub>2</sub> / graphene (CMG) composite                                             | O <sub>2</sub> , RT, 8 h                   | 24 W compact fluorescent bulb                 | 6             | 79        | 6    |
| vi     | UiO-68-mtpdc/etpdc                                                                                        | Air, 12 h                                  | blue LEDs ( $\lambda_{\max}$ = 450 nm)        | 5             | 88        | 7    |
| vii    | OH-TFP-TTA                                                                                                | MeOH, 6 h, 25 °C                           | 460 nm LED                                    | 4             | 76        | 8    |
| viii   | 15 mg mpg-C <sub>3</sub> N <sub>4</sub>                                                                   | 22-34 h, 1 bar O <sub>2</sub>              | 60 W energy-saving bulb,                      |               | 92        | 9    |
| ix     | 2 mg LP-Cu <sub>2</sub> O                                                                                 | O <sub>2</sub> balloon, 8 h                | 4 W blue LEDs                                 | 5             | 90        | 10   |
| x      | TFB-COF catalyst (30 mg, 30 mol%)                                                                         | RT, O <sub>2</sub> (1 atm),                | 45 W energy-saving lamp                       | 4             | 76        | 11   |
| xi     | Au <sub>4</sub> @MOF1                                                                                     | RT, 3.5 h, O <sub>2</sub>                  | $\lambda_{\max} > 370$ nm                     | 5             | 86        | 12   |
| xii    | ZIF-9 (10 wt%)                                                                                            | 6 h, 40 °C                                 | Solar simulator with a 515 nm longpass filter | 4             | 84        | 13   |
| xiii   | 10 mg EY@UiO-66-NH <sub>2</sub>                                                                           | MeOH, 8 h, RT                              | 16 W visible household light                  | 10            | 82        | 14   |
| xiv    | Cu-TPA (3 mol%)                                                                                           | 30 h                                       | 26 W fluorescent lamp                         | 3             | 79        | 15   |
| xv     | Phosphorescent cross-linked polymers 1 derivatives of Ru(bpy) <sub>3</sub> <sup>2+</sup> (0.2 mol% ratio) | 8 h                                        | 26 W fluorescent lamp                         | 4             | 89        | 16   |
| xvi    | In <sub>2</sub> S <sub>3</sub> /MoS <sub>2</sub> composite                                                | O <sub>2</sub> , RT, 24 h                  | 20 W LED bulb                                 | 6             | 74        | 17   |
| xvii   | PCN-808-BDBR                                                                                              |                                            | 450 nm LED lamp                               | 6             | 99        | 18   |
| xviii  | Ir-PCP (1 mol%) /Ru-PCP (0.2 mol%)                                                                        | 8 h                                        | Visible Light                                 | 4             | 94/90     | 19   |
| xix    | CdS                                                                                                       | MeCN, 24 h                                 | h $\nu$ 440 nm                                |               | 97        | 20   |
| xx     | RuL <sub>3</sub> @InBTB                                                                                   |                                            | 20 W fluorescent lamp                         | 9             | 80        | 21   |
| xxi    | 1 mol% MOF-5/MOF-6 catalyst                                                                               | 12 h                                       | 26 W fluorescent lamp                         | 59/86         | 3         | 22   |
| xxii   | 2 mg PAF-BT(Ph) <sub>2</sub>                                                                              | RT, air                                    | 23 W lamp                                     | 97            | 5         | 23   |
| xxiii  | ZJU-56-0.2                                                                                                | 32 h, 323 K                                | 660 nm LEDs                                   | 54            | 3         | 24   |

| S. No. | Catalyst                   | Conditions                | Light source                        | Recyclability | Yield (%) | Ref.                |
|--------|----------------------------|---------------------------|-------------------------------------|---------------|-----------|---------------------|
| xiv    | RB-CMP1                    | RT, air, 15 h             | 60 W household bulb                 | 95            | 10        | <sup>25</sup>       |
| xv     | Cu@Xantphos@ASMNPs (35 mg) | 1 mL MeOH, RT, air, 18 h. | 20 × 2 W white LEDs as light source | 5             | 90        | <b>Present work</b> |

## <sup>1</sup>H AND <sup>13</sup>C NMR DATA OF THE CORRESPONDING PRODUCTS

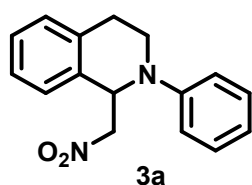

**1-(nitromethyl)-2-phenyl-1,2,3,4-tetrahydroisoquinoline (3a).**<sup>1</sup> <sup>1</sup>H NMR (400 MHz, CDCl<sub>3</sub>) δ 7.33-7.21 (m, 5H), 7.17 (d, *J* = 7.3 Hz, 1H), 7.02 (d, *J* = 8.3 Hz, 2H), 6.89 (t, *J* = 7.3 Hz, 1H), 5.59 (t, *J* = 7.1 Hz, 1H), 4.90 (dd, *J* = 11.8, 7.8 Hz, 1H), 4.60 (dd, *J* = 11.8, 6.8 Hz, 1H), 3.74-3.62 (m, 2H), 3.16-3.08 (m, 1H), 2.83 (dt, *J* = 16.3, 4.9 Hz, 1H); <sup>13</sup>C NMR (100 MHz, CDCl<sub>3</sub>) δ 148.5, 135.3, 133.0, 129.5, 129.2, 128.1, 127.0, 126.7, 119.5, 115.2, 78.8, 58.2, 42.1, 26.5.

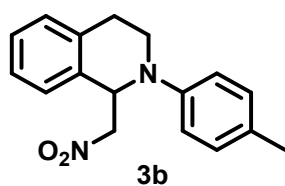

**1-(nitromethyl)-2-(p-tolyl)-1,2,3,4-tetrahydroisoquinoline (3b).**<sup>1</sup> <sup>1</sup>H NMR (400 MHz, CDCl<sub>3</sub>) δ 7.26-7.06 (m, 6H), 6.88 (d, *J* = 8.5 Hz, 2H), 5.49 (t, *J* = 7.2 Hz, 1H), 4.85 (dd, *J* = 11.8, 8.1 Hz, 1H), 4.55 (dd, *J* = 11.8, 6.3 Hz, 1H), 3.67-3.54 (m, 2H), 3.10-3.02 (m, 1H), 2.74 (dt, *J* = 16.4, 4.5 Hz, 1H), 2.26 (s, 3H); <sup>13</sup>C NMR (100 MHz, CDCl<sub>3</sub>) δ 146.5, 135.5, 133.0, 130.1, 129.4, 129.2, 128.1, 127.1, 126.7, 116.0, 76.8, 58.5, 42.4, 26.3, 20.5.

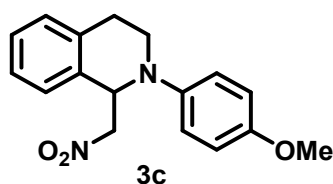

**2-(4-Methoxyphenyl)-1-(nitromethyl)-1,2,3,4-tetrahydroisoquinoline (3c).**<sup>1</sup> <sup>1</sup>H NMR (400 MHz, CDCl<sub>3</sub>) δ 7.29-7.17 (m, 4H), 6.95 (d, *J* = 9.0 Hz, 2H), 6.85 (d, *J* = 9.0 Hz, 2H), 5.43 (dd, *J* = 8.4, 6.1 Hz, 1H), 4.86 (dd, *J* = 11.8, 8.8 Hz, 1H), 4.59 (q, *J* = 5.9 Hz, 1H), 3.78 (s, 3H), 3.61-3.58 (m, 2H), 3.09-3.00 (m, 1H), 2.72 (dt, *J* = 16.5, 3.8 Hz, 1H); <sup>13</sup>C NMR (100 MHz, CDCl<sub>3</sub>) δ 154.0, 143.0, 135.5, 132.9, 129.5, 127.9, 126.9, 126.6, 118.8, 114.7, 79.0, 58.9, 55.6, 43.1, 25.8.

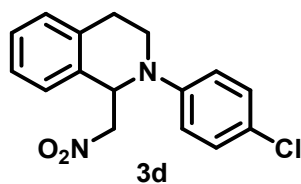

**2-(4-chlorophenyl)-1-(nitromethyl)-1,2,3,4-tetrahydroisoquinoline (3d).**<sup>1</sup> <sup>1</sup>H NMR (400 MHz, CDCl<sub>3</sub>) 7.31-7.16 (m, 6H), 6.92 (d, *J* = 9.0 Hz, 2H), 5.52 (t, *J* = 7.3 Hz, 1H), 4.87 (dd, *J* = 12.0, 8.0 Hz, 1H), 4.59 (dd, *J* = 11.9, 6.4 Hz, 1H), 3.70-3.62 (m, 2H), 3.13-



3.05 (m, 1H), 2.81 (dt,  $J = 16.3, 4.8$  Hz, 1H);  $^{13}\text{C}$  NMR (100 MHz,  $\text{CDCl}_3$ )  $\delta$  147.1, 135.1, 132.5, 129.3, 128.2, 127.0, 126.8, 124.4, 116.5, 78.7, 58.2, 42.2, 26.2.

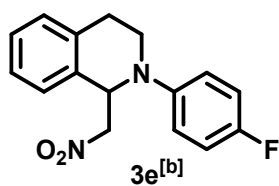

**2-(4-fluorophenyl)-1-(nitromethyl)-1,2,3,4-tetrahydroisoquinoline**

**(3e).**  $^1\text{H}$  NMR (400 MHz,  $\text{CDCl}_3$ )  $\delta$  7.27-6.89 (m, 9H), 5.43 (dd,  $J = 8.7, 5.9$  Hz, 1H), 4.83 (dd,  $J = 12.0, 8.7$  Hz, 1H), 4.57 (q,  $J = 6.0$  Hz, 1H), 3.59 (q,  $J = 4.5$  Hz, 2H), 3.07-2.99 (m, 1H), 2.72 (dt,  $J = 16.5, 4.2$

Hz, 1H);  $^{13}\text{C}$  NMR (100 MHz,  $\text{CDCl}_3$ )  $\delta$  158.4, 156.0, 145.4, 135.4, 132.6, 129.6, 128.2, 127.1, 118.0, 116.1, 115.8, 78.9, 58.8, 42.9, 25.8.

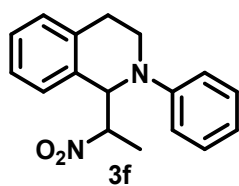

**1-(1-nitroethyl)-2-phenyl-1,2,3,4-tetrahydroisoquinoline (3f).**<sup>26</sup>

$^1\text{H}$  NMR (400 MHz,  $\text{CDCl}_3$ )  $\delta$  7.12-7.33 (m, 6H), 7.02 (d,  $J = 8.5$  Hz, 2H), 6.82-6.87 (m, 1H), 5.27 (t,  $J = 8.8$  Hz, 1H), [5.04-5.11 (m), 4.88-4.95 (m), 1H], [3.83-3.90 (m), 3.62 (dd,  $J = 15.1, 5.9$  Hz), 2H], [3.05-3.12 (m),

2.87-2.98 (m), 2H], [1.73 (d,  $J = 6.8$  Hz), 1.57 (d,  $J = 6.8$  Hz), 3H];  $^{13}\text{C}$  NMR (100 MHz,  $\text{CDCl}_3$ )  $\delta$  149.2, 148.9, 135.6, 134.8, 133.8, 132.0, 129.4, 129.3, 129.1, 128.7, 128.4, 128.2, 127.3, 126.6, 126.1, (119.3, 118.8), (115.4, 114.5), (89.0, 85.4), (62.8, 61.2), (43.6, 42.7), (26.8, 26.4), (17.4, 16.4).

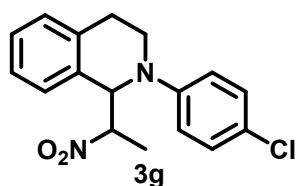

**2-(4-Chlorophenyl)-1-(1-nitroethyl)-1,2,3,4-tetrahydro-**

**isoquinoline (3g).**<sup>26</sup>  $^1\text{H}$  NMR (400 MHz,  $\text{CDCl}_3$ )  $\delta$  7.26-7.09 (m, 6H), 6.91-6.85 (2H), 5.15 (dd,  $J = 22.9, 8.7$  Hz, 1 H), [5.03-4.96 (m), 4.86 (dt,  $J = 15.6, 6.9$  Hz), 1 H], [3.84-3.76 (m), 3.59-3.47 (m), 2H],

[3.07-2.99 (m), 2.94-2.83 (m), 2H], [1.66 (d,  $J = 6.7$  Hz), 1.54 (d,  $J = 6.6$  Hz), 3H];  $^{13}\text{C}$  NMR (100 MHz,  $\text{CDCl}_3$ )  $\delta$  147.8, 147.6, 135.4, 134.6, 133.6, 131.8, 129.3, 129.3, 129.2, 128.8, 128.5, 127.2, 126.8, 126.3, (116.7, 115.8), (88.9, 85.5), (62.9, 61.2), (43.9, 42.9), (26.7, 26.2), (17.4, 16.7).

## NMR SPECTRA

### <sup>1</sup>H NMR Spectra of 1-(nitromethyl)-2-phenyl-1,2,3,4-tetrahydroisoquinoline

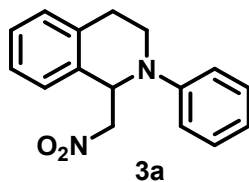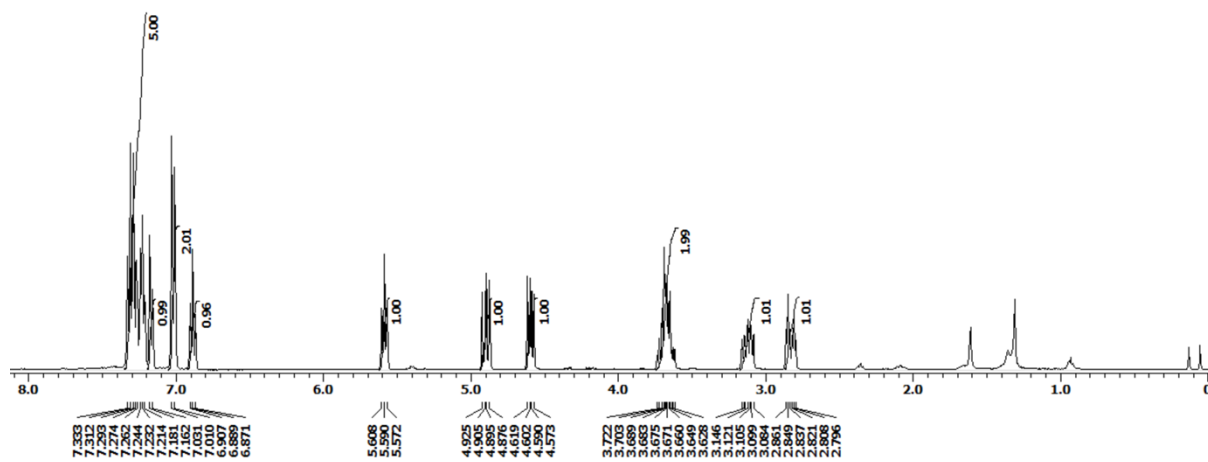

### <sup>13</sup>C NMR Spectra of 1-(nitromethyl)-2-phenyl-1,2,3,4-tetrahydroisoquinoline

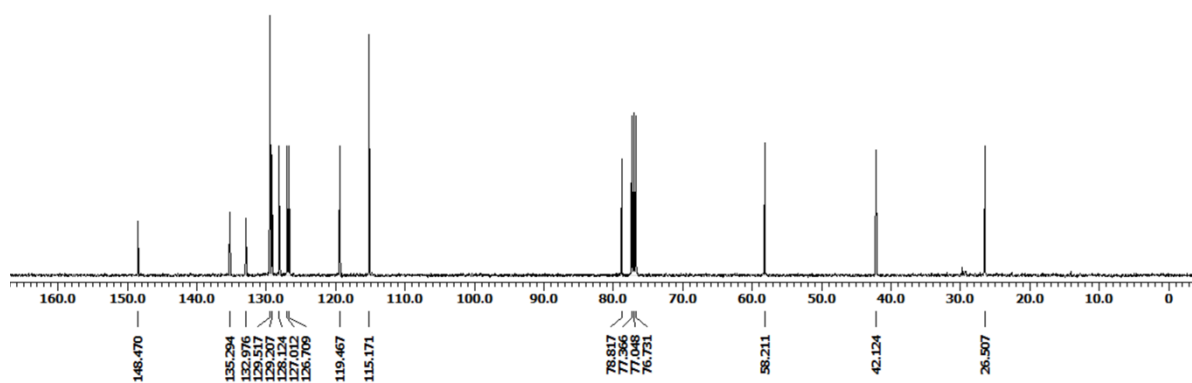

## <sup>1</sup>H NMR Spectra of 2-(4-Methoxyphenyl)-1-(nitromethyl)-1,2,3,4-tetrahydro isoquinoline

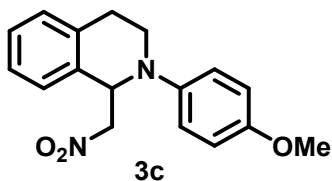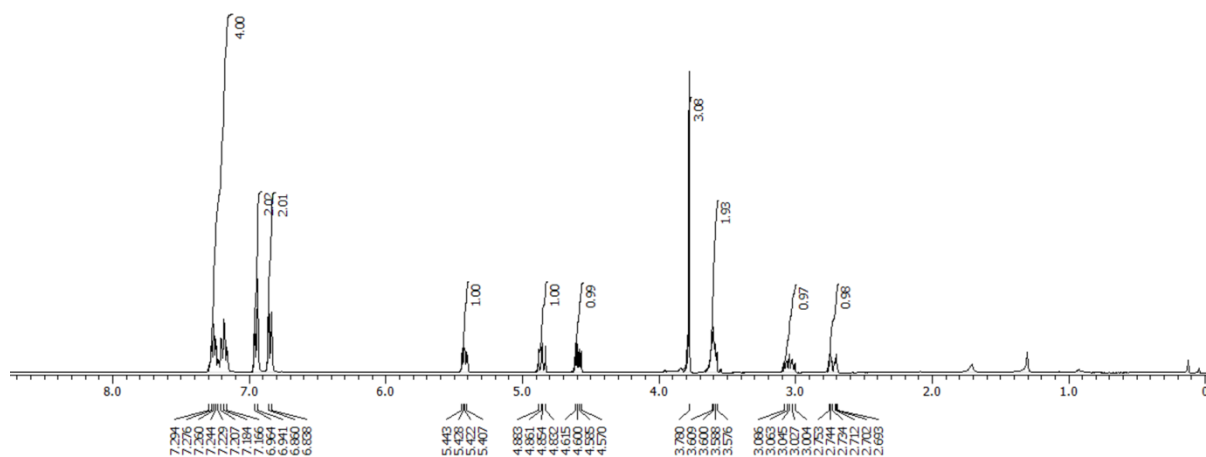

## <sup>13</sup>C NMR Spectra of 2-(4-Methoxyphenyl)-1-(nitromethyl)-1,2,3,4-tetrahydro isoquinoline

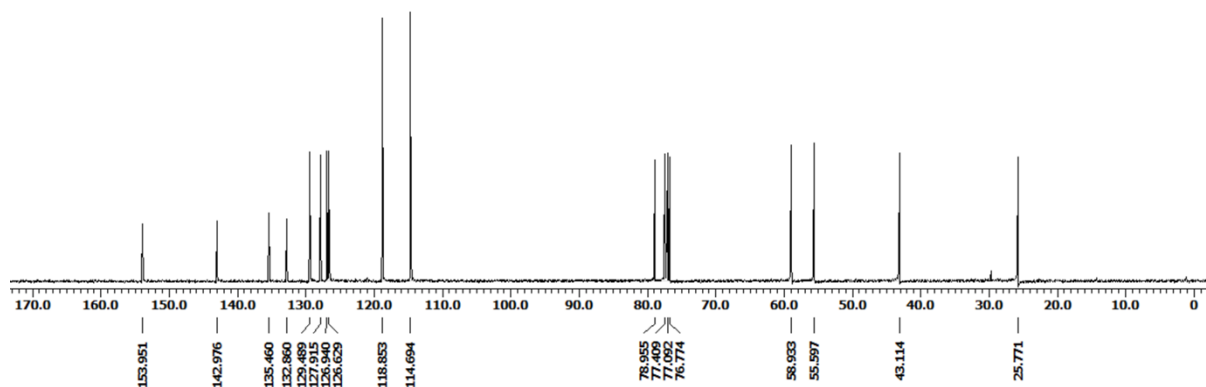

## REFERENCES

1. P. Rana, R. Gaur, R. Gupta, G. Arora, A. Jayashree and R. K. Sharma, *Chemical communications*, 2019, **55**, 7402-7405.
2. L. Xiao, Y. Huang, Y. Luo, B. Yang, Y. Liu, X. Zhou and J. Zhang, *ACS Sustainable Chemistry & Engineering*, 2018, **6**, 14759-14766.

3. C.-A. Wang, Y.-W. Li, X.-L. Cheng, J.-P. Zhang and Y.-F. Han, *RSC advances*, 2017, **7**, 408-414.
4. M. Rueping, J. Zoller, D. C. Fabry, K. Poscharny, R. M. Koenigs, T. E. Weirich and J. Mayer, *Chemistry—A European Journal*, 2012, **18**, 3478-3481.
5. P. Li, G.-W. Wang, X. Zhu and L. Wang, *Tetrahedron*, 2019, **75**, 3448-3455.
6. Z. Li, Y. Pi, D. Xu, Y. Li, W. Peng, G. Zhang, F. Zhang and X. Fan, *Applied Catalysis B: Environmental*, 2017, **213**, 1-8.
7. Q.-Y. Li, Z. Ma, W.-Q. Zhang, J.-L. Xu, W. Wei, H. Lu, X. Zhao and X.-J. Wang, *Chemical communications*, 2016, **52**, 11284-11287.
8. H. Liu, C. Li, H. Li, Y. Ren, J. Chen, J. Tang and Q. Yang, *ACS applied materials & interfaces*, 2020, **12**, 20354-20365.
9. L. Moehlmann, M. Baar, J. Rieß, M. Antonietti, X. Wang and S. Blechert, *Advanced Synthesis & Catalysis*, 2012, **354**, 1909-1913.
10. J. Wang, J. Ma, X. Li, Y. Li, G. Zhang, F. Zhang and X. Fan, *Chemical communications*, 2014, **50**, 14237-14240.
11. W. Liu, Q. Su, P. Ju, B. Guo, H. Zhou, G. Li and Q. Wu, *ChemSusChem*, 2017, **10**, 664-669.
12. C.-Y. Sun, W.-P. To, X.-L. Wang, K.-T. Chan, Z.-M. Su and C.-M. Che, *Chemical science*, 2015, **6**, 7105-7111.
13. M. E. Potter, C. P. Ross, D. Gianolio, R. Rios and R. Raja, *Catalysis Science & Technology*, 2020, **10**, 7262-7269.
14. G. Kumar, P. Solanki, M. Nazish, S. Neogi, R. I. Kureshy and H. K. Noor-ul, *Journal of Catalysis*, 2019, **371**, 298-304.
15. D. Shi, X. Guo, T. Lai, K. Zheng, Q. Wu, C. Sun, C. He and J. Zhao, *Inorganic Chemistry Communications*, 2019, **105**, 9-12.
16. J.-L. Wang, C. Wang, K. E. deKrafft and W. Lin, *ACS Catalysis*, 2012, **2**, 417-424.
17. Z. Li, Z. Zhou, J. Ma, Y. Li, W. Peng, G. Zhang, F. Zhang and X. Fan, *Applied Catalysis B: Environmental*, 2018, **237**, 288-294.
18. J. Pang, Z. Di, J.-S. Qin, S. Yuan, C. T. Lollar, J. Li, P. Zhang, M. Wu, D. Yuan and M. Hong, *Journal of the American Chemical Society*, 2020, **142**, 15020-15026.
19. Z. Xie, C. Wang, K. E. deKrafft and W. Lin, *Journal of the American Chemical Society*, 2011, **133**, 2056-2059.
20. T. Mitkina, C. Stanglmair, W. Setzer, M. Gruber, H. Kisch and B. König, *Organic & biomolecular chemistry*, 2012, **10**, 3556-3561.
21. I. H. Choi, S. Yoon, S. Huh, S. J. Kim and Y. Kim, *Chemistry—A European Journal*, 2020, **26**, 14580-14584.
22. C. Wang, Z. Xie, K. E. deKrafft and W. Lin, *Journal of the American Chemical Society*, 2011, **133**, 13445-13454.
23. N. Huber and K. A. Zhang, *European Polymer Journal*, 2020, **140**, 110060.
24. H. Li, Y. Yang, C. He, L. Zeng and C. Duan, *ACS Catalysis*, 2018, **9**, 422-430.
25. J.-X. Jiang, Y. Li, X. Wu, J. Xiao, D. J. Adams and A. I. Cooper, *Macromolecules*, 2013, **46**, 8779-8783.
26. B. Wang, D. P. Shelar, X. Z. Han, T. T. Li, X. Guan, W. Lu, K. Liu, Y. Chen, W. F. Fu and C. M. Che, *Chemistry—A European Journal*, 2015, **21**, 1184-1190.
